# Supplementary material for: Competing thermal expansion mismatch and lattice strain engineered growth of crack free WS2 in-plane heterostructures
Source: Royal Society of Chemistry journal article supplement (doi:10.1039/c8tc04573a), 2018-01-01
Supplement: c8tc04573a1.pdf [file c8tc04573a1.pdf]

## Supporting Information

### Competing thermal expansion mismatch and lattice strain engineered growth of crack free WS<sub>2</sub> in-plane heterostructures

<sup>1</sup>Pawan Kumar, <sup>2</sup>Birender Singh, <sup>2</sup>Pradeep Kumar and <sup>1</sup>Viswanath Balakrishnan\*

<sup>1</sup>School of Engineering, Indian Institute of Technology Mandi, Kamand, Himachal Pradesh-175005, India.

<sup>2</sup>School of Basic Sciences, Indian Institute of Technology Mandi, Kamand, Himachal Pradesh-175005, India.

\* Corresponding author, E-mail: [viswa@iitmandi.ac.in](mailto:viswa@iitmandi.ac.in)

#### Structure of 1T, 1H and 1T' phases in WS<sub>2</sub>:

WS<sub>2</sub> has mainly three allotropes in its structure which are 1T, 1H and 1T' depending on coordination of S-atom with W-atoms as well as stacking order of its layers. Among the three polymorphs, 1H having trigonal prismatic coordination while 1T and 1T' have commonly octahedral coordination. Formation of two polytypes next to each other is trivial with coexisting phase materials and stabilizing themselves resulting from the thermodynamic favored conditions. Strain energy minimization stabilizes co-existing phases at room temperature and has been explored here upto their decomposition states using in-situ PL measurements.

| S. No | 2D Layer         | Phase | Space Group                                                     | Structure (Co-ordination)        | Lattice Parameters |           | Band Gap       |
|-------|------------------|-------|-----------------------------------------------------------------|----------------------------------|--------------------|-----------|----------------|
| 1.    | MoS <sub>2</sub> | 1T    | P3m1                                                            | Trigonal (Octahedral)            | a=5.6Å             | c=5.99Å   | Metallic       |
| 2.    |                  | 1T'   |                                                                 | Trigonal (Octahedral)            |                    |           | Semi-metallic  |
| 3.    |                  | 1H    |                                                                 | Hexagonal(Trigonal prismatic)    |                    |           | Semiconducting |
| 4.    |                  | 2H    | P6 <sub>3</sub> /m mc<br>D <sub>6h</sub> :P6 m2 D <sub>3h</sub> | Hexagonal(Trigonal prismatic)    | a=3.15 Å           | c=12.3Å   | Semiconducting |
| 5.    |                  | 3R    | R3m                                                             | Rhombohedral(Trigonal prismatic) | a=3.17 Å           | c=18.38 Å | Semiconducting |
| 6.    |                  | 1T    | P3m1                                                            | Tetragonal(Octahedral)           |                    |           | Metallic       |

|     |                 |     |                          |                                     |             |          |                |
|-----|-----------------|-----|--------------------------|-------------------------------------|-------------|----------|----------------|
| 7.  | WS <sub>2</sub> | 1T' |                          | Trigonal(Octahedral)                |             |          | Semi-metallic  |
| 8.  |                 | 1H  |                          | Hexagonal                           |             |          |                |
| 9.  |                 | 2H  | P6 <sub>3</sub> /m<br>mc | Hexagonal                           | a=3.19<br>Å |          | Semiconducting |
| 10. |                 | 3R  | R3m                      | Rhombohedral(Trigonal<br>prismatic) | a=3.16<br>Å | c=18.5 Å | Semiconducting |

Physical and chemical properties in bulk polytype of 1H and 1T' are almost equal except its slightly changed band structure. 1H polytype show semiconducting in nature while 1T and 1T' show metallic and semimetallic, both form due to distortions in coordination geometry. This causes slight changes in PL position (1H and 1T') with slightly reduced intensity. While the metallic 1T phase known to show complete PL quenching, the observed 1T' phase shows considerable intensity due to its semimetallic in nature.

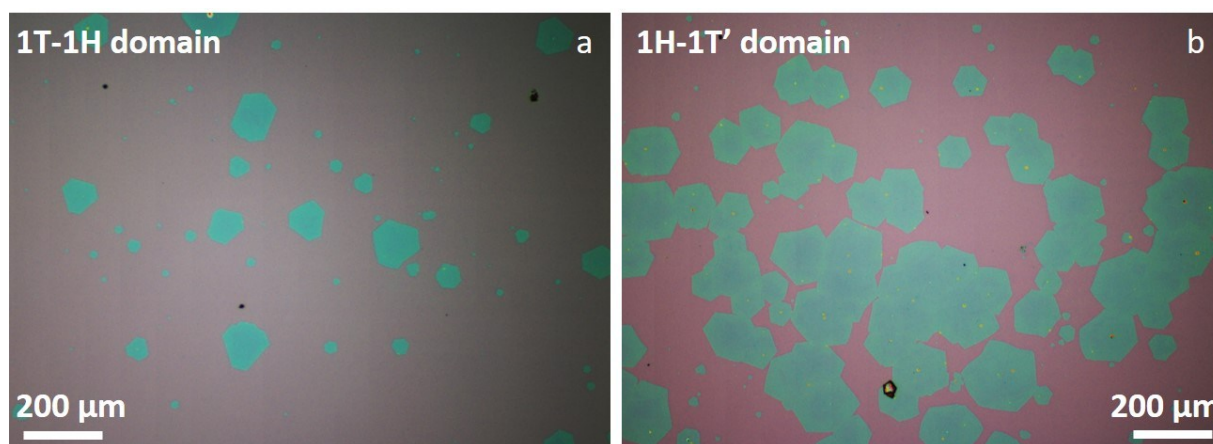

Figure S1: VLM image of monolayer WS<sub>2</sub> with wide dispersion of large areal flakes for (a) 1T-1H phase as well as (b) 1H-1T' phase respectively. Here we could see no optical contrast for coexisting phases present in as grown monolayers.

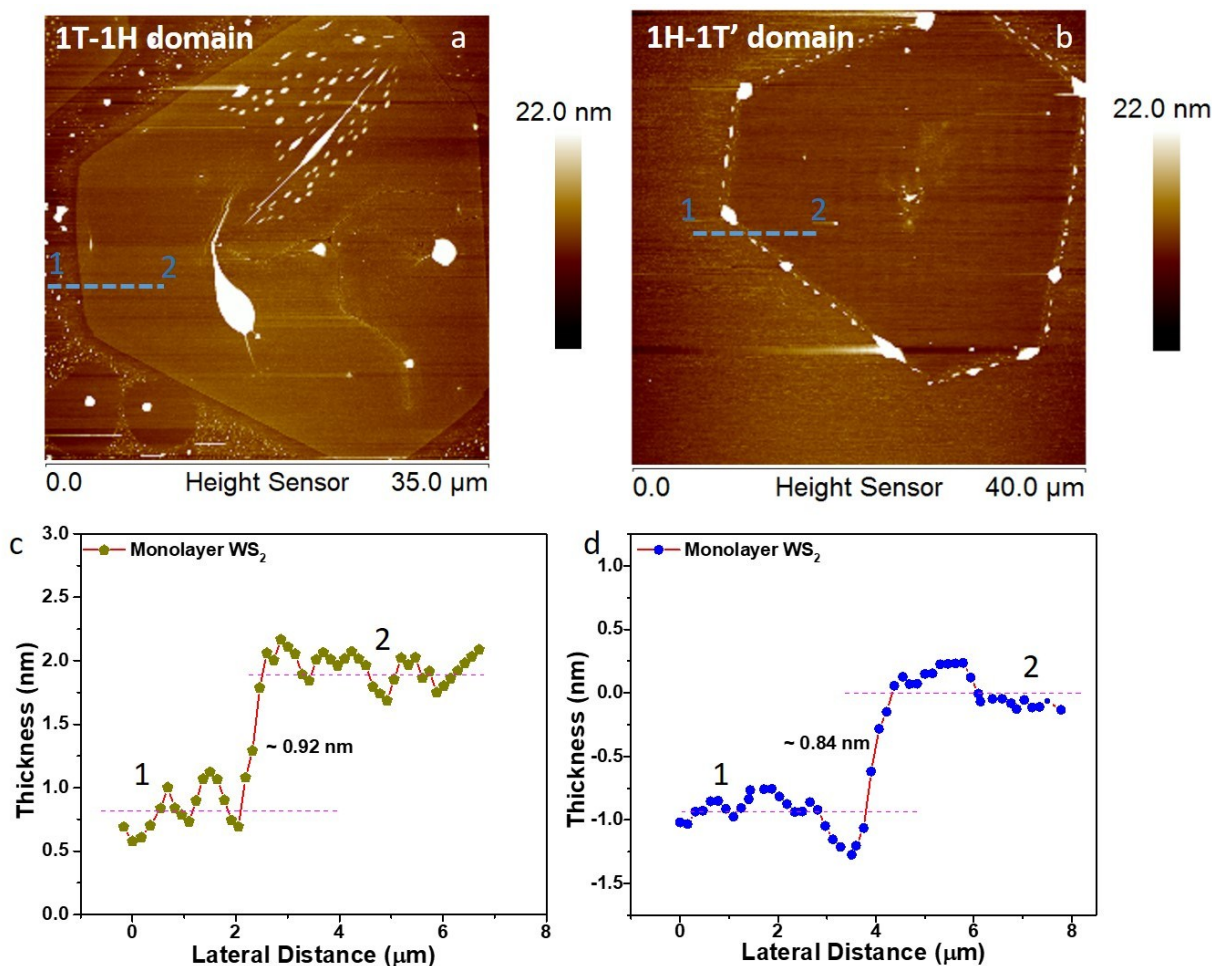

Figure S2: Surface morphology and thickness profile of as grown monolayers are characterized using atomic force microscopy (AFM). (a, b) Representative AFM height image and thickness profiling (c, d) of as grown monolayer  $\text{WS}_2$  with coexisting 1T-1H and 1H-1T' polymorphs respectively.

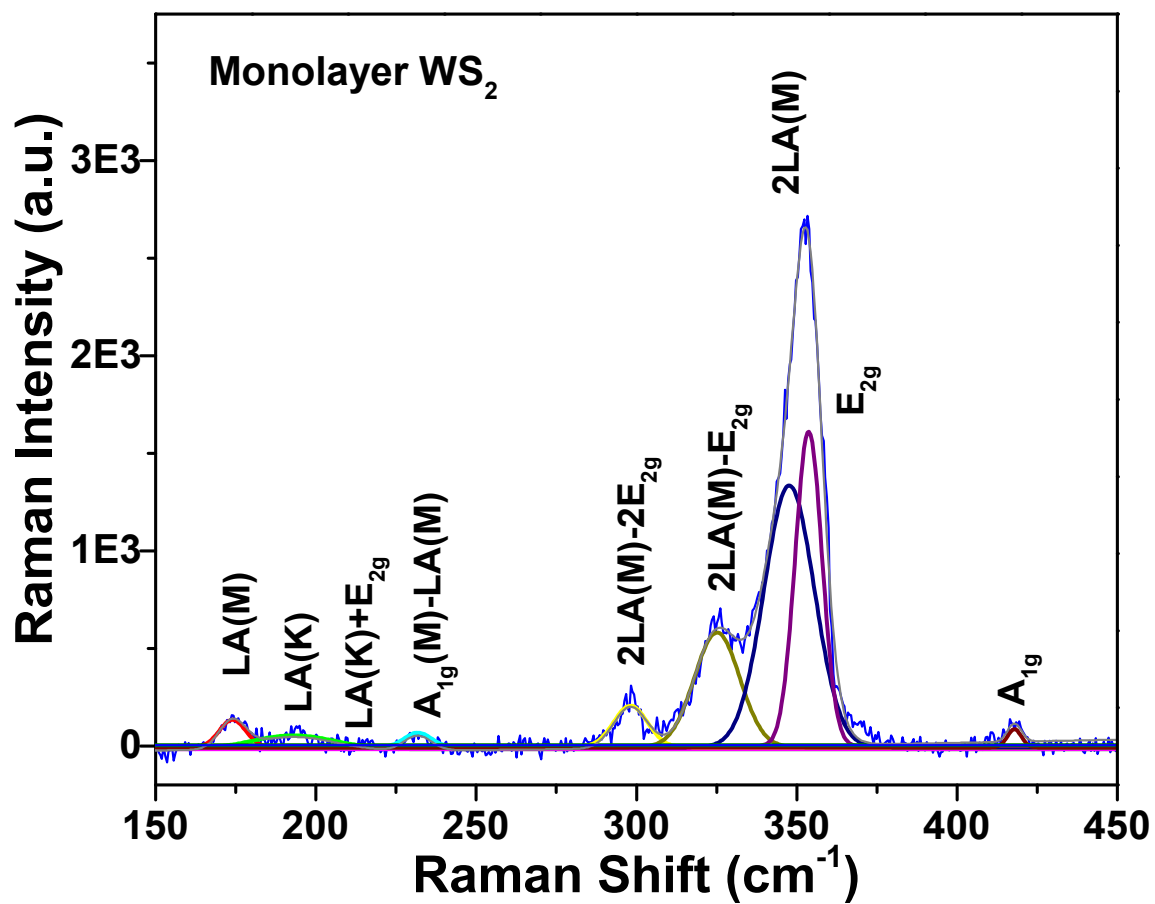

Figure S3: Basic indexing for as present all Raman modes in 1H monolayer  $\text{WS}_2$ .

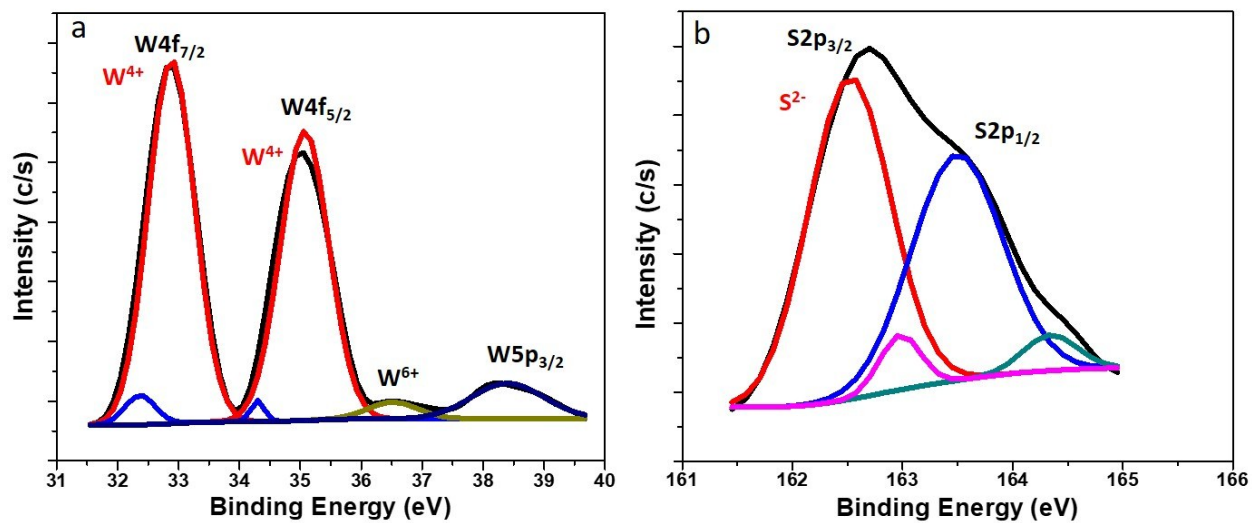

Figure S4: XPS characteristics of monolayer  $WS_2$  with W and S-oxidation states which corresponds to formation of  $WS_2$  along with small amount of Oxygen presence ( $W^{6+}$ ) which might be cause of  $O_2$ -adsorption at monolayer active edges from atmosphere.

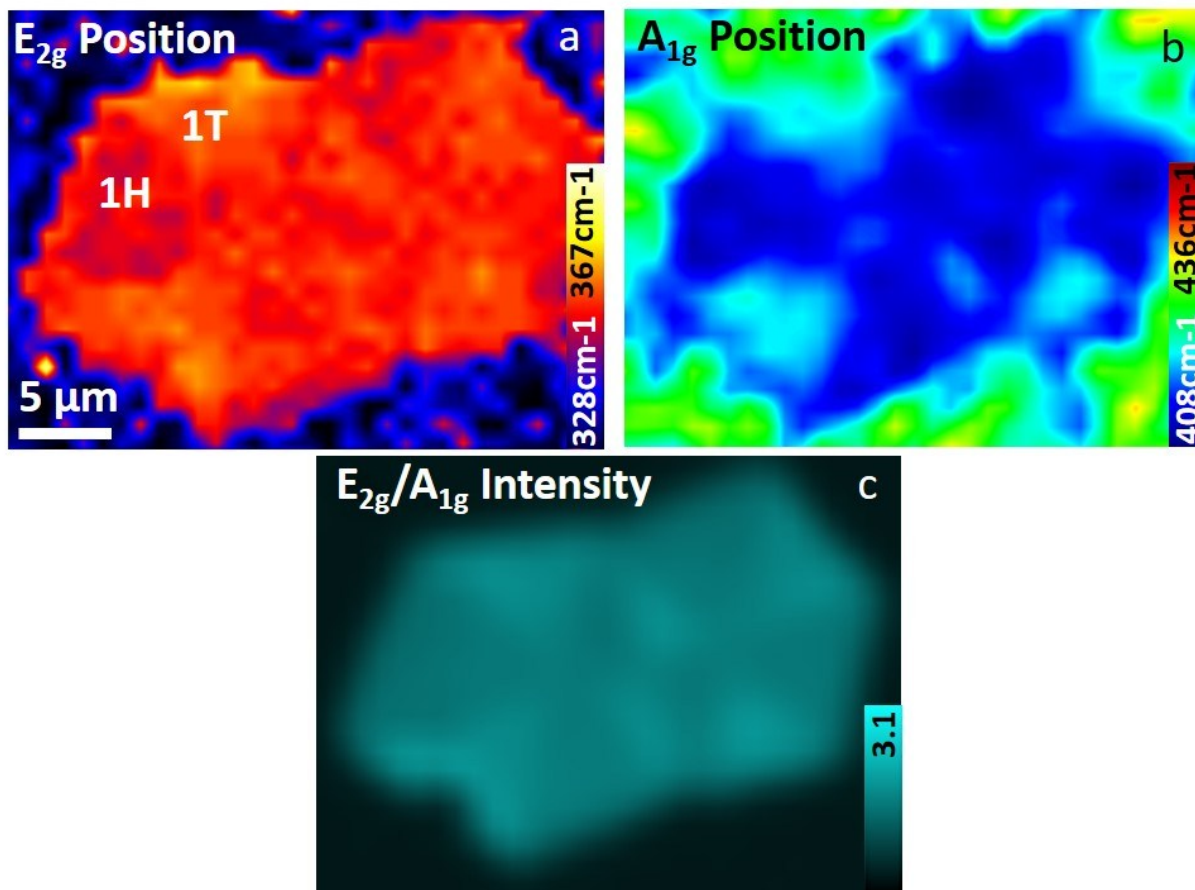

Figure S5: Spatially resolved Raman position mapping for 1T-1H polymorph of monolayer  $\text{WS}_2$  which coexist in a single domain as indicated here and shown for  $E_{2g}$ ,  $A_{1g}$  positions as well as their ratio intensity mapping.

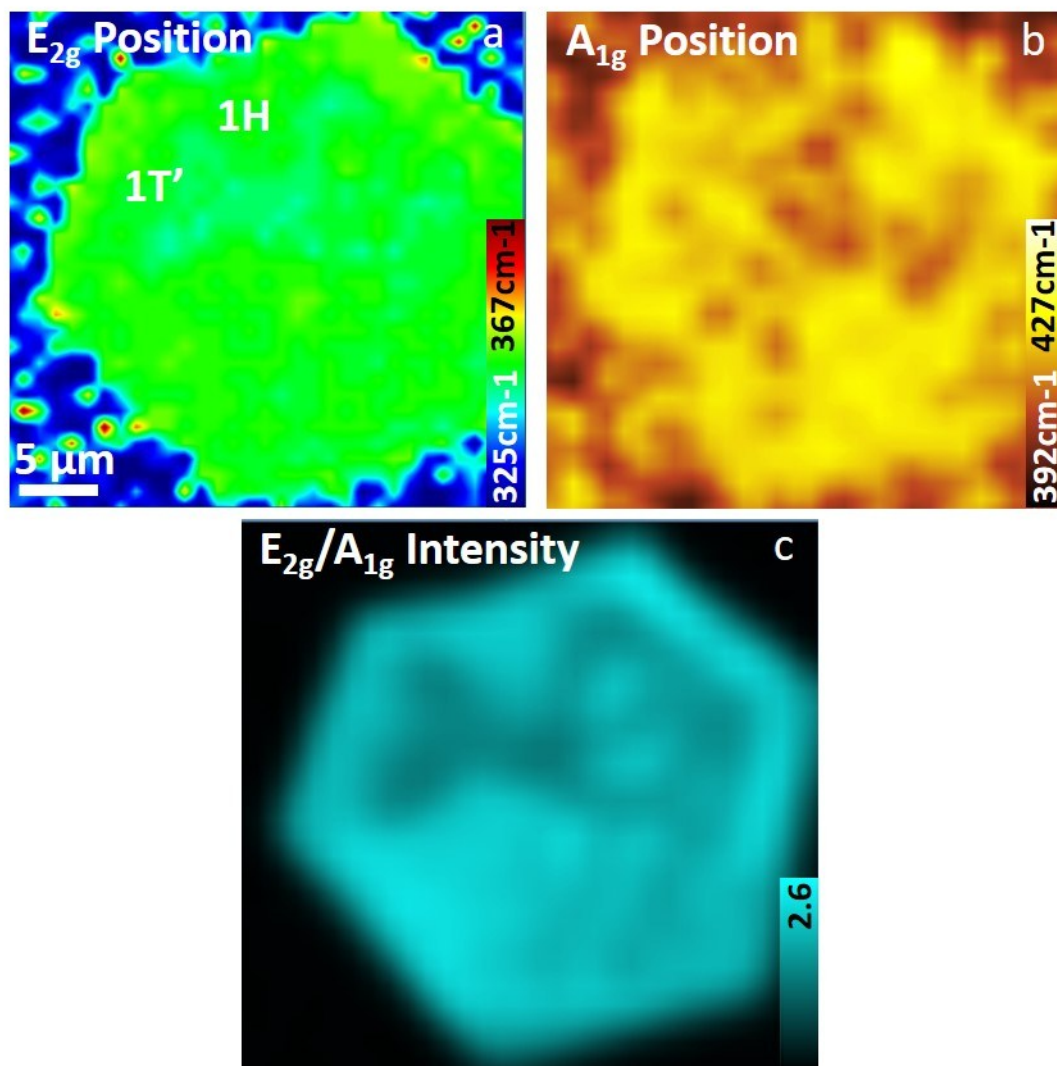

Figure S6: Spatially resolved Raman position mapping for 1H-1T' polymorph of monolayer WS<sub>2</sub> which coexist in a single domain as indicated here and shown for E<sub>2g</sub>, A<sub>1g</sub> positions as well as their ratio intensity mapping.



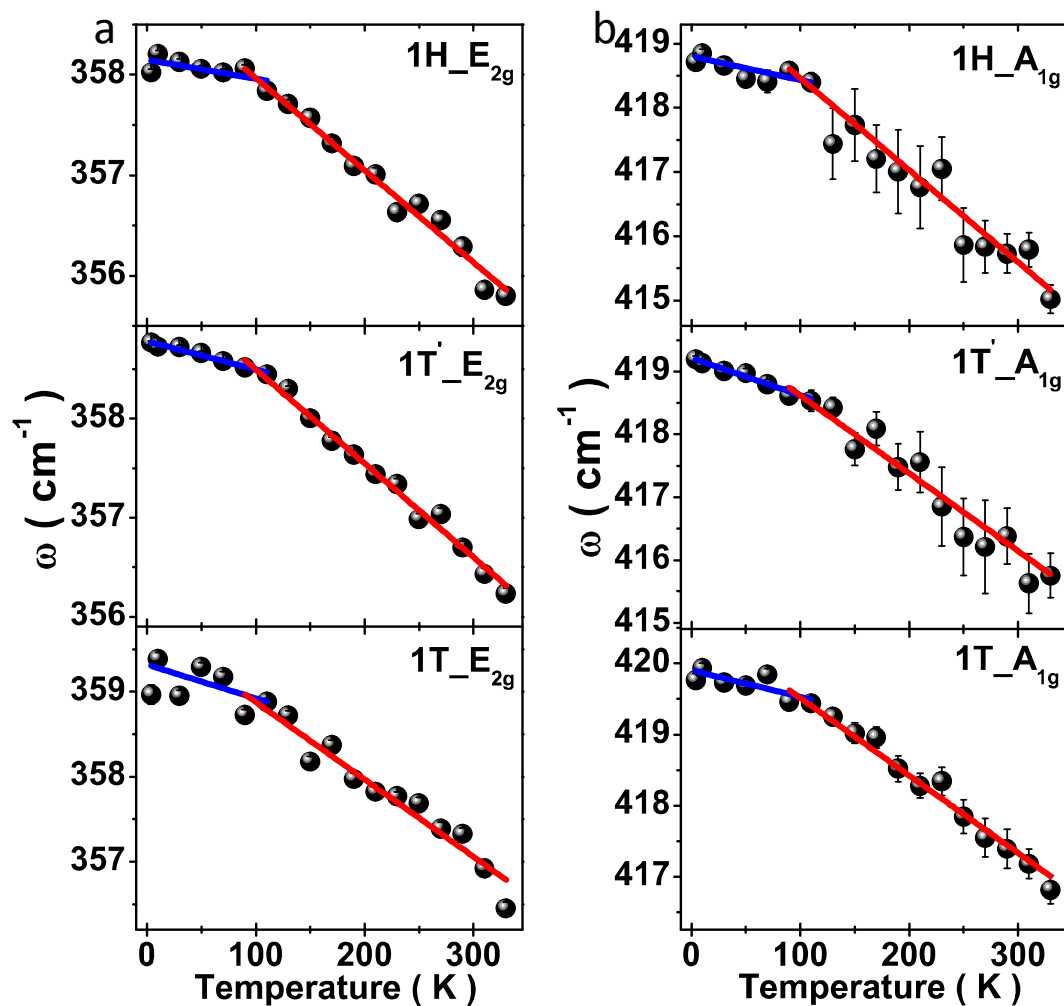

Figure S7. Linearly Fitted  $E_{2g}$  and  $A_{1g}$  modes for 1T, 1H and 1T' polymorphs of monolayer  $\text{WS}_2$  are shown in (a) and (b) for temperature range of 4K-330K respectively. Two fitting regions have been identified as 4K-110K and 110K-330K respectively for which it suited well for linear variation of in-plane ( $E_{2g}$ ) and out of plane ( $A_{1g}$ ) modes.



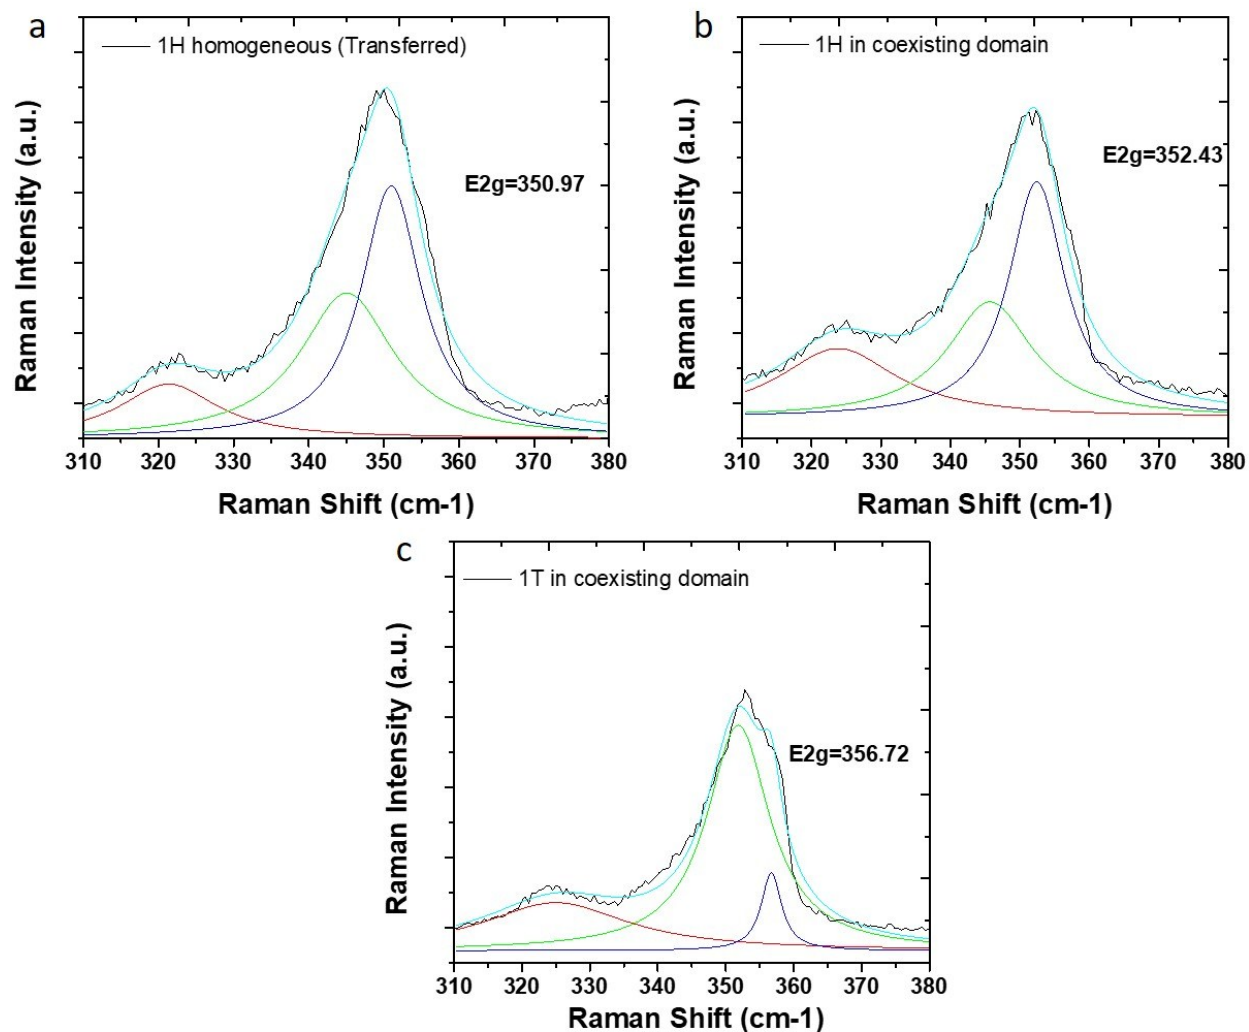

Figure S8: Deconvoluted Raman band for 2LA (M) and  $E_{2g}$  band for monolayer  $WS_2$  to distinguish Raman shift between (a) homogeneous (1H only), (b) 1H heterogeneous and (c) 1T heterogeneous phases.

**Table ST1:** Calculated parameters used to fit in three-phonon process and adapted model (equation 3 and 4) which suited to best to fit the nonlinearity of thermal expansion for 1H, 1T' and 1T phase of monolayer WS<sub>2</sub> using E<sub>2g</sub> and A<sub>1g</sub> modes respectively.

| Phase | E <sub>2g</sub>   |                                      |                                    |                                       |
|-------|-------------------|--------------------------------------|------------------------------------|---------------------------------------|
|       | c                 | a <sub>0</sub>                       | a <sub>1</sub>                     | a <sub>2</sub>                        |
| 1H    | - (0.314 ± 0.043) | - (6.693 ± 4.023) × 10 <sup>-6</sup> | (2.360 ± 0.668) × 10 <sup>-7</sup> | - (4.862 ± 2.339) × 10 <sup>-10</sup> |
| 1T'   | - (0.155 ± 0.026) | - (2.261 ± 2.715) × 10 <sup>-6</sup> | (2.295 ± 0.466) × 10 <sup>-7</sup> | - (4.699 ± 1.652) × 10 <sup>-10</sup> |
| 1T    | - (0.109 ± 0.172) | (5.377 ± 6.559) × 10 <sup>-6</sup>   | (1.356 ± 1.452) × 10 <sup>-7</sup> | - (1.995 ± 4.643) × 10 <sup>-10</sup> |

| Phase | A <sub>1g</sub>   |                                     |                                      |                                     |
|-------|-------------------|-------------------------------------|--------------------------------------|-------------------------------------|
|       | c                 | a <sub>0</sub>                      | a <sub>1</sub>                       | a <sub>2</sub>                      |
| 1H    | - (1.276 ± 0.066) | (11.958 ± 7.845) × 10 <sup>-6</sup> | - (9.885 ± 5.538) × 10 <sup>-8</sup> | (5.449 ± 5.486) × 10 <sup>-10</sup> |
| 1T'   | - (0.877 ± 0.028) | (16.348 ± 3.602) × 10 <sup>-6</sup> | - (9.516 ± 7.836) × 10 <sup>-8</sup> | (4.994 ± 2.941) × 10 <sup>-10</sup> |
| 1T    | - (1.152 ± 0.062) | (11.768 ± 5.331) × 10 <sup>-6</sup> | - (9.811 ± 8.964) × 10 <sup>-8</sup> | (4.616 ± 3.095) × 10 <sup>-10</sup> |
